# Supplementary material
Source: PubMed Central journal article supplement (PMC4300676)
Supplement: JVI.01783-14_zjv999099925so1.pdf [file JVI.01783-14_zjv999099925so1.pdf]

Supplementary Table 1. Proteins from the EGFP-L IP sample (in the context of the mini-replicon) identified by LC MS/MS by two or more peptides and showing a ratio of relative expression level increased more than 2-fold compared to the same proteins from the control IP sample. EGFP-L was expressed in the context of the HRSV mini-replicon system. The gene name, protein name, human ortholog name, a brief description of the protein, the number of peptides used to identify and quantify the protein and the fold change of the protein between the bait and control systems is shown for each protein. Individual ion scores are indicated in the form of a Mascot derived (-10 log (PEP)) Confidence score where >13 indicated identity or extensive homology (p < 0.05).

| Gene Name  | Protein Name | Human ortholog | Description                               | Peptides identified | Peptides used for quant | Binding ratio | Confidence score |
|------------|--------------|----------------|-------------------------------------------|---------------------|-------------------------|---------------|------------------|
| Hist2h2aa1 | H2A2A        |                | Histone H2A type 2-A                      | 2                   | 2                       | 33.0          | 139.9            |
| L_HRSVA    | L_HRSVA      |                | HRSV RNA-directed RNA polymerase L        | 25                  | 24                      | 20.6          | 2431.6           |
| N_HRSVA    | NCAP_HRSVA   |                | HRSV Nucleoprotein                        | 9                   | 9                       | 17.9          | 996.9            |
| Stip1      | STIP1        | STIP           | Stress-induced-phosphoprotein 1           | 13                  | 2                       | 15.5          | 1088.2           |
| Sfn        | 1433S        | SFN            | 14-3-3 protein sigma                      | 4                   | 1                       | 9.6           | 106.3            |
| Hsp90aa1   | HS90A        | HSP90AA1       | Heat shock protein HSP 90-alpha           | 5                   | 1                       | 8.5           | 462.0            |
| Dnaja2     | DNJA2        | DNAJA2         | DnaJ homolog subfamily A member 2         | 3                   | 3                       | 7.5           | 359.3            |
| Myof       | MYOF         | MYOF           | Myoferlin                                 | 2                   | 2                       | 6.2           | 95.3             |
| Dnajb6     | DNJB6        | DNAJB6         | DnaJ homolog subfamily B member 6         | 2                   | 1                       | 4.4           | 167.8            |
| P_HRSVA    | PHOSP_HRSVA  |                | HRSV Phosphoprotein                       | 20                  | 16                      | 4.0           | 2323.1           |
| Rps27a     | RS27A        |                | Ubiquitin-40S ribosomal protein S27a      | 5                   | 2                       | 3.5           | 814.9            |
| Dnaja1     | DNJA1        | DNAJA1         | DnaJ homolog subfamily A member 1         | 7                   | 6                       | 3.3           | 774.6            |
| Hspa4      | HSP74        | HSPA4          | Heat shock 70 kDa protein 4               | 8                   | 6                       | 3.2           | 680.2            |
| Hspa1b     | HS71B        | HSPA1B         | Heat shock 70 kDa protein 1B              | 33                  | 30                      | 3.1           | 4897.9           |
| Capza1     | CAZA1        | CAPZA1         | F-actin-capping protein subunit alpha-1   | 3                   | 1                       | 3.1           | 316.7            |
| Fam193b    | F193B        |                | Protein FAM193B                           | 3                   | 1                       | 2.7           | 48.0             |
| Cct2       | TCPB         | CCT2           | T-complex protein 1 subunit beta          | 3                   | 3                       | 2.3           | 228.7            |
| Rpl15      | RL15         | RPL15          | 60S ribosomal protein L15                 | 3                   | 3                       | 2.3           | 352.8            |
| Hsph1      | HS105        | HSPH1          | Heat shock protein 105 Kda                | 13                  | 11                      | 2.3           | 1739.4           |
| Gstp1      | GSTP1        | GSTP1          | Glutathione S-transferase P 1             | 2                   | 2                       | 2.2           | 201.2            |
| Hnrnpf     | HNRPF        | HNRNPF         | Heterogeneous nuclear ribonucleoprotein F | 2                   | 2                       | 2.1           | 242.4            |
| H3f3c      | H3C          |                | Histone H3.3C                             | 2                   | 2                       | 2.0           | 36.8             |

Supplementary Table 2. Proteins from the EGFP-P P sample (in the context of the mini-replicon) identified by LC MS/MS by two or more peptides and showing a ratio of relative expression level increased more than 2-fold compared to the same proteins from the control IP sample. EGFP-P was expressed in the context of the HRSV mini-replicon system. The gene name, protein name, human ortholog name, a brief description of the protein, the number of peptides used to identify and quantify the protein and the fold change of the protein between the bait and control systems is shown for each protein. Individual ion scores are indicated in the form of a Mascot derived (-10 log (PEP)) Confidence score where >13 indicated identity or extensive homology (p < 0.05).

| Gene Name | Protein Name | Human ortholog | Description                                          | Peptides identified | Peptides used for quant | Binding ratio | Confidence score |
|-----------|--------------|----------------|------------------------------------------------------|---------------------|-------------------------|---------------|------------------|
| N_HRSVA   | NCAP_HRSVA   |                | HRSV Nucleoprotein                                   | 9                   | 9                       | 154.9         | 996.9            |
| L_HRSVA   | L_HRSVA      |                | HRSV RNA-directed RNA polymerase L                   | 25                  | 24                      | 32.0          | 2431.6           |
| P_HRSVA   | PHOSP_HRSVA  |                | HRSV Phosphoprotein                                  | 20                  | 16                      | 28.3          | 2323.1           |
| Eif2s2    | IF2B         | EIF2S2         | Eukaryotic translation initiation factor 2 subunit 2 | 2                   | 2                       | 9.6           | 28.1             |
| Stip1     | STIP1        | STIP1          | Stress-induced-phosphoprotein 1                      | 13                  | 2                       | 8.3           | 1088.2           |
| Dnaja1    | DNJA1        | DNAJA1         | DnaJ homolog subfamily A member 1                    | 7                   | 6                       | 7.1           | 774.6            |
| Rps23     | RS23         | RPS23          | 40S ribosomal protein S23                            | 3                   | 3                       | 6.9           | 191.8            |
| Mvp       | WDR35        | MVP            | Major vault protein                                  | 29                  | 28                      | 5.6           | 2548.9           |
| Rpl18a    | RL18A        | RPL18A         | 60S ribosomal protein L18a                           | 4                   | 4                       | 5.4           | 259.8            |
| Rpl37a    | RL37A        | RPL37A         | 60S ribosomal protein L37a                           | 3                   | 3                       | 5.0           | 148.5            |
| Hspa1b    | HS71B        | HSPA1A         | Heat shock cognate 71 kDa protein                    | 33                  | 30                      | 4.6           | 4897.9           |
| Myof      | MYOF         | MYOF           | Myoferlin                                            | 2                   | 2                       | 4.6           | 95.3             |
| Rpl32-ps  | RL32P        |                | Putative 60S ribosomal protein L32                   | 2                   | 2                       | 3.7           | 102.7            |
| Hnrnpa3   | ROA3         | HNRNPA3        | Heterogeneous nuclear ribonucleoprotein A3           | 4                   | 4                       | 3.6           | 334.8            |
| Rps27a    | RS27A        |                | Ubiquitin-40S ribosomal protein S27a                 | 5                   | 2                       | 3.6           | 814.9            |
| Rps26     | RS26         | RPS26          | 40S ribosomal protein S26                            | 3                   | 3                       | 3.4           | 49.1             |
| Rpl15     | RL15         | RPL15          | 60S ribosomal protein L15                            | 3                   | 3                       | 3.2           | 352.8            |
| Rpl3      | RL3          | RPL3           | 60S ribosomal protein L3                             | 5                   | 3                       | 3.0           | 682.3            |

|            |       |          |                                             |    |    |     |        |
|------------|-------|----------|---------------------------------------------|----|----|-----|--------|
| Dnaja2     | DNJA2 | DNAJA2   | DnaJ homolog subfamily A member 2           | 3  | 3  | 3.0 | 359.3  |
| Hsp90aa1   | HS90A | HSP90AA1 | Heat shock protein HSP 90-alpha             | 5  | 1  | 2.9 | 462.0  |
| Rpl24      | RL24  | RPL24    | 60S ribosomal protein L24                   | 3  | 2  | 2.8 | 56.5   |
| Hnrnpab    | HNRDL | HNRNPAB  | Heterogeneous nuclear ribonucleoprotein A/B | 5  | 3  | 2.8 | 555.9  |
| Hsph1      | HS105 | HSPH1    | Heat shock protein 105 kDa                  | 13 | 11 | 2.6 | 1739.4 |
| Ldha       | LDHA  | LDHA     | L-lactate dehydrogenase A chain             | 3  | 3  | 2.6 | 271.5  |
| Rpl28      | RL28  | RPL28    | 60S ribosomal protein L28                   | 9  | 9  | 2.5 | 513.3  |
| Hnrnpa1    | ROA1  | HNRNPA1  | Heterogeneous nuclear ribonucleoprotein A1  | 8  | 8  | 2.4 | 755.8  |
| Rpl7a      | RL7A  | RPL7A    | 60S ribosomal protein L7a                   | 2  | 2  | 2.4 | 113.1  |
| Rpl13      | RL13  | RPL13    | 60S ribosomal protein L13                   | 6  | 6  | 2.4 | 672.2  |
| Hist2h2aa1 | H2A2A |          | Histone H2A type 2-A                        | 2  | 2  | 2.4 | 139.9  |
| Bag3       | BAG3  | BAG3     | BAG family molecular chaperone regulator 3  | 3  | 3  | 2.3 | 386.3  |
| Uba52      | RL40  | UBA52    | Ubiquitin-60S ribosomal protein L40         | 5  | 2  | 2.3 | 516.2  |
| Hsp90ab1   | LRGUK | HSP90AB1 | Heat shock protein HSP 90-beta              | 14 | 10 | 2.3 | 1652.8 |
| Hnrnpf     | HNRPF | HNRNPF   | Heterogeneous nuclear ribonucleoprotein F   | 2  | 2  | 2.2 | 242.4  |
| Npm1       | NPM   | NPM1     | Nucleophosmin                               | 4  | 3  | 2.2 | 673.7  |
| Myh11      | MYH11 | MYH11    | Myosin-11                                   | 4  | 1  | 2.2 | 315.0  |
| Rpl30      | RL30  | RPL30    | 60S ribosomal protein L30                   | 2  | 2  | 2.2 | 379.1  |
| Rpl8       | RL8   | RPL8     | 60S ribosomal protein L8                    | 6  | 6  | 2.1 | 473.5  |
| Hnrnpa0    | ROA0  | HNRNPA0  | Heterogeneous nuclear ribonucleoprotein A0  | 2  | 2  | 2.1 | 167.2  |
| Rpl31      | RL31  | TPL31    | 60S ribosomal protein L31                   | 6  | 6  | 2.1 | 274.8  |
| Rpl19      | RL19  | RPL19    | 60S ribosomal protein L19                   | 2  | 2  | 2.1 | 181.8  |
| Pabpc1     | PABP1 | PABPC1   | Polyadenylate-binding protein 1             | 8  | 8  | 2.0 | 860.8  |
